# Supplementary material for: Ultra-small Co3O4 particles embedded into N-doped carbon derived from ZIF-9 via half-pyrolysis for activating peroxymonosulfate to degrade sulfamethoxazole
Source: Royal Society of Chemistry journal article supplement (doi:10.1039/d3ra00323j), 2023-01-01
Supplement: d3ra00323j1.pdf [file d3ra00323j1.pdf]

## Supporting Information

### **Ultra-small Co<sub>3</sub>O<sub>4</sub> particles embedded into N-doped carbon derived from ZIF-9 via half-pyrolysis for activating peroxymonosulfate to degrade sulfamethoxazole**

Bin Su<sup>a,b</sup>, Lu Zhang<sup>a,b</sup>, Yifan Wang<sup>a,b</sup>, Yuxin Li<sup>a,b</sup>, Tianyu Zhou<sup>a,b</sup>, Bo Liu<sup>b</sup>, Wei Jiang<sup>a,b,\*</sup>, Linlin Liu<sup>b,\*</sup>, Chunhong Ma<sup>a,b,\*</sup>

*<sup>a</sup> College of Engineering, Jilin Normal University, Siping, 136000, P. R. China.*

*<sup>b</sup> Key Laboratory of Preparation and Application of Environmental Friendly Materials (Jilin Normal University), Ministry of Education, Changchun 130103, P. R. China.*

*\*Correspondence author*

*E-mail: jiangwjlnu@163.com (Wei Jiang)*

*E-mail: jlsd111@163.com (Linlin Liu)*

*E-mail: jlspmch@163.com (Chunhong Ma)*

*Fax: +86-434-3290623*

# 1. Experimental

## 1.1 Materials and methods

Cobalt acetate tetrahydrate ( $\text{Co}(\text{CH}_3\text{COO})_2 \cdot 4\text{H}_2\text{O}$ , Sinopharm Chemical Reagent Co., Ltd., AR), benzimidazole ( $\text{C}_7\text{H}_6\text{N}_2$ , Shanghai Macklin Biochemical Co., Ltd., AR), Ethanol (Tianjin Tiantai, AR), PMS ( $2\text{KHSO}_5 \cdot \text{KHSO}_4 \cdot \text{K}_2\text{SO}_4$ , Shanghai Aladdin Biochemical Technology Co., Ltd.  $\geq 42\%$ ), SMX ( $\text{C}_{10}\text{H}_{11}\text{N}_3\text{O}_3\text{S}$ , Shanghai Saen Chemical Technology Co., Ltd., AR),  $\text{Na}_2\text{S}_2\text{O}_3$  (Sinopharm Chemical Reagent Co., Ltd., AR), KCl (Shanghai Macklin Biochemical Co., Ltd., AR),  $\text{NaHCO}_3$  (Tianjin Guangfu Technology Development Co., Ltd., AR),  $\text{KH}_2\text{PO}_4$  (Beijing Beihua Fine Chemicals Co., Ltd., AR), Humic acid sodium salt ( $\text{C}_9\text{H}_8\text{Na}_2\text{O}_4$ , Shanghai Macklin Biochemical Co., Ltd., AR), Furfuryl alcohol ( $\text{C}_5\text{H}_6\text{O}_2$ , Shanghai Macklin Biochemical Co., Ltd., AR), *tert*-Butanol ( $\text{C}_4\text{H}_{10}\text{O}$ , Shanghai Macklin Biochemical Co., Ltd., AR), *p*-Benzoquinone ( $\text{C}_6\text{H}_4\text{O}_2$ , Adamas Reagent Co., Ltd., AR) were employed in this work without further purification.

## 1.2 Characterization

Scanning electron microscope (SEM), energy-dispersive X-ray spectroscopy (EDX, AZtecLive UltimMax100) were observed by Hitachi Regulus 8100. Transmission electron microscope (TEM) was characterized by FEI Tecnai G2 F20. Fourier transform infrared (FT-IR) spectra were acquired on a ThermoScientific Nicolet 4700 Fourier Transform Infrared Spectrometer with KBr pellet. X-ray diffraction (XRD) data were collected on a PANalytical B.V. Empyrean powder diffractometer using a  $\text{Cu K}\alpha$  source ( $\lambda = 1.5418 \text{ \AA}$ ) over the range of  $2\theta = 5.0\text{--}80.0^\circ$ . The sorption isotherm for  $\text{N}_2$  was measured by using a Micromeritics ASAP 2460 analyzer with ultra-high-purity gas (99.999% purity). X-ray photoelectron spectroscopy (XPS) was recorded using Escalab 250XI X-ray electron spectrometer (VG Scientific, America). Electron paramagnetic resonance (EPR) spectra were recorded on a Bruker A300 spectrometer.

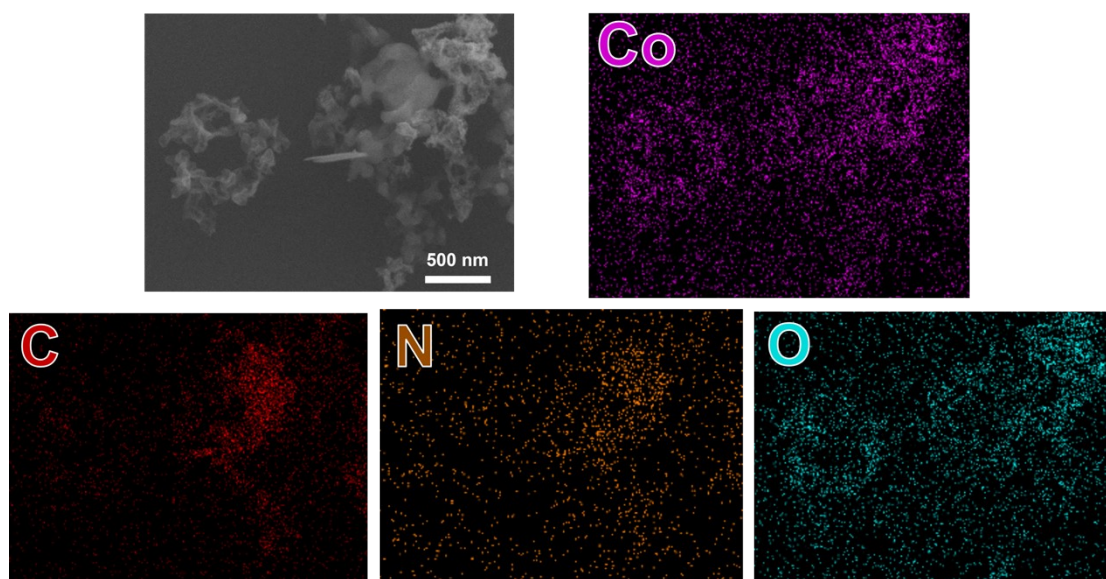

**Fig. S1.** The EDS-mapping of  $\text{Co}_3\text{O}_4@\text{NC-350}$ .

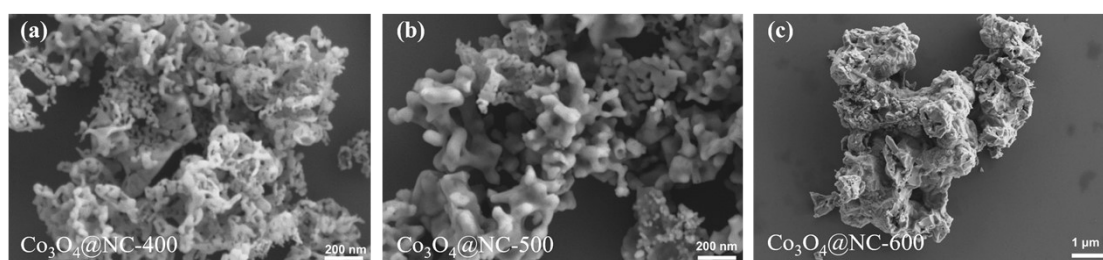

**Fig. S2.** The SEM images of  $\text{Co}_3\text{O}_4@\text{NC-400}$ ,  $\text{Co}_3\text{O}_4@\text{NC-500}$ ,  $\text{Co}_3\text{O}_4@\text{NC-600}$

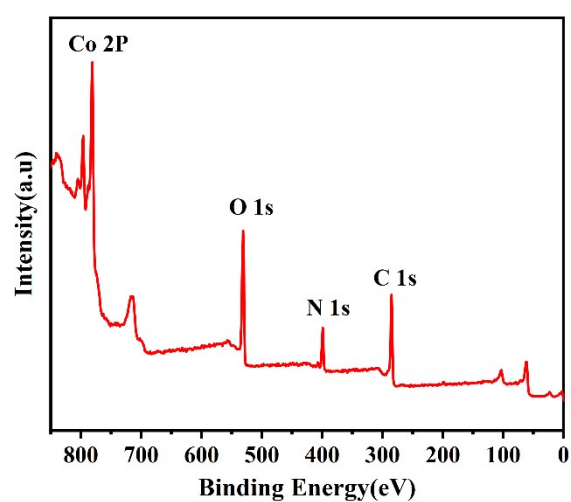

**Fig. S3.** The survey XPS spectrum of  $\text{Co}_3\text{O}_4@\text{NC-350}$ .

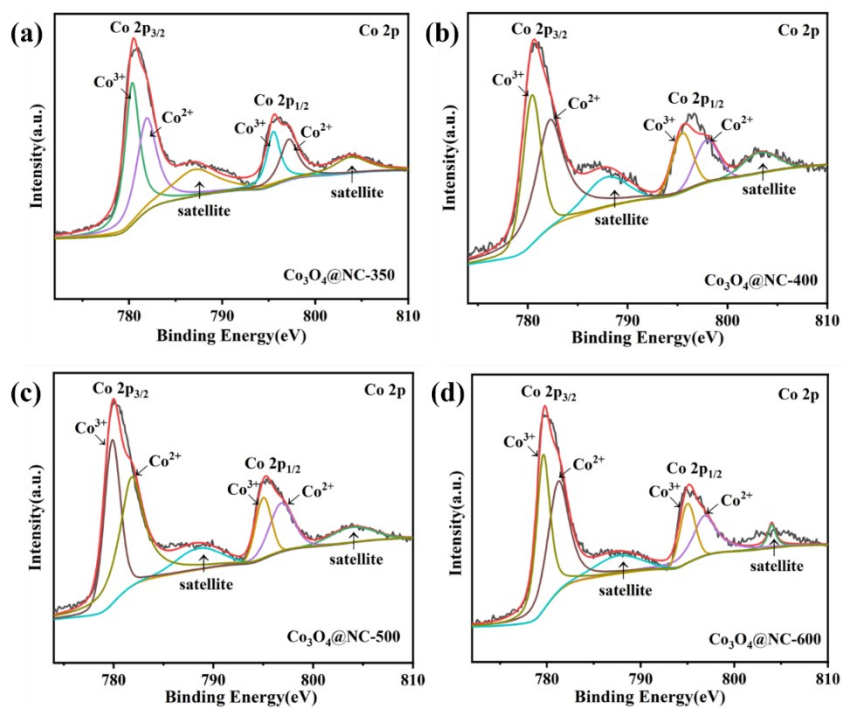

**Fig. S4.** The high-resolution XPS spectra of  $\text{Co}_3\text{O}_4@\text{NC}$ -350,  $\text{Co}_3\text{O}_4@\text{NC}$ -400,  $\text{Co}_3\text{O}_4@\text{NC}$ -500, and  $\text{Co}_3\text{O}_4@\text{NC}$ -600.

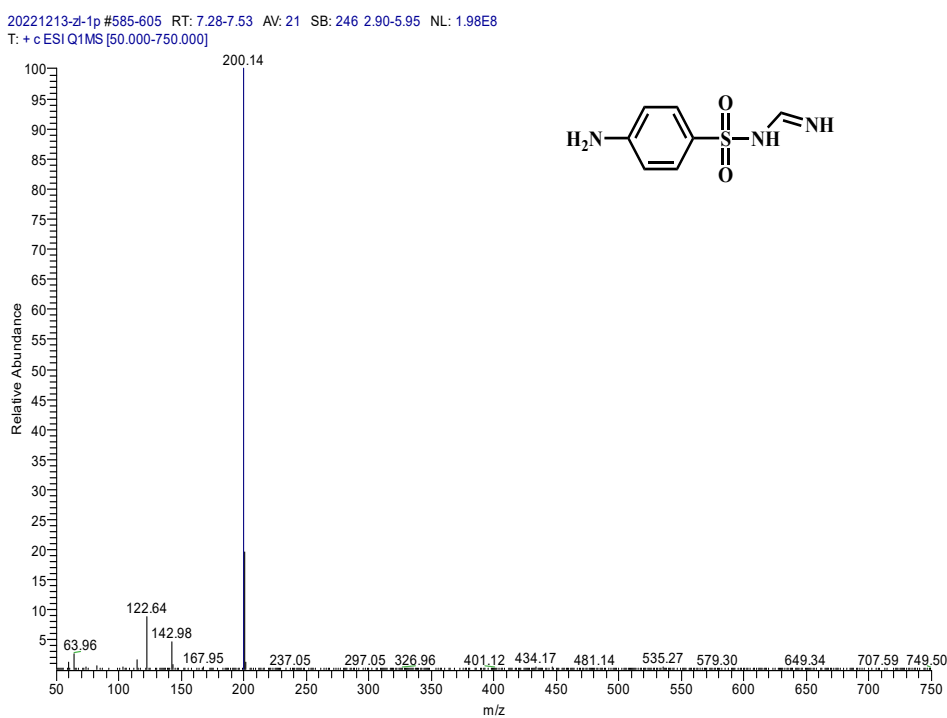

**Fig. S5.** Mass spectra of 200 in SMX degradation products.

20221213-zl-1p #691-716 RT: 8.60-8.91 AV: 26 SB: 27 7.68-8.01 NL: 4.02E7  
T: + c ESI Q1MS [50.000-750.000]

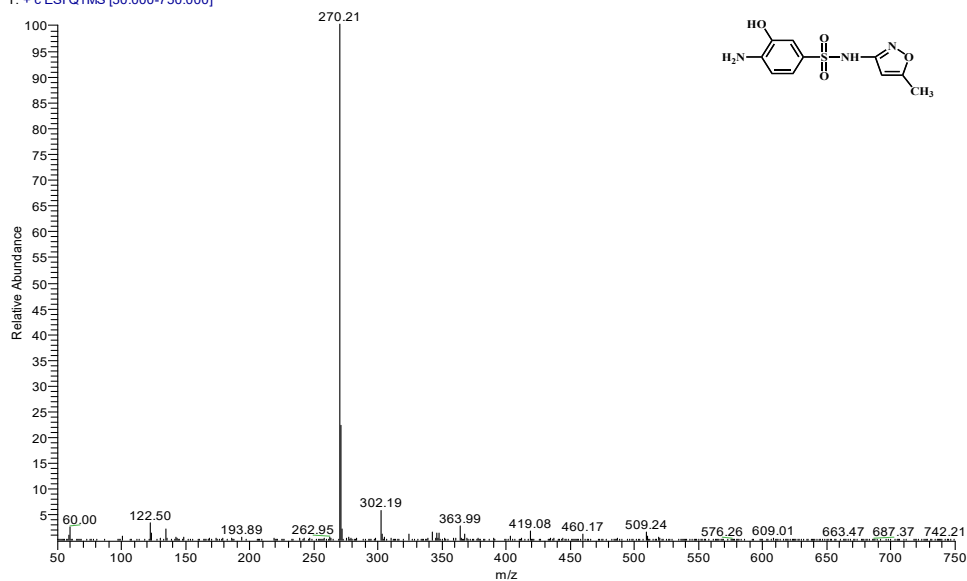

**Fig. S6.** Mass spectra of 270 in SMX degradation products.

20221213-zl-1p #641-658 RT: 7.98-8.19 AV: 18 SB: 27 7.68-8.01 NL: 6.32E6  
T: + c ESI Q1MS [50.000-750.000]

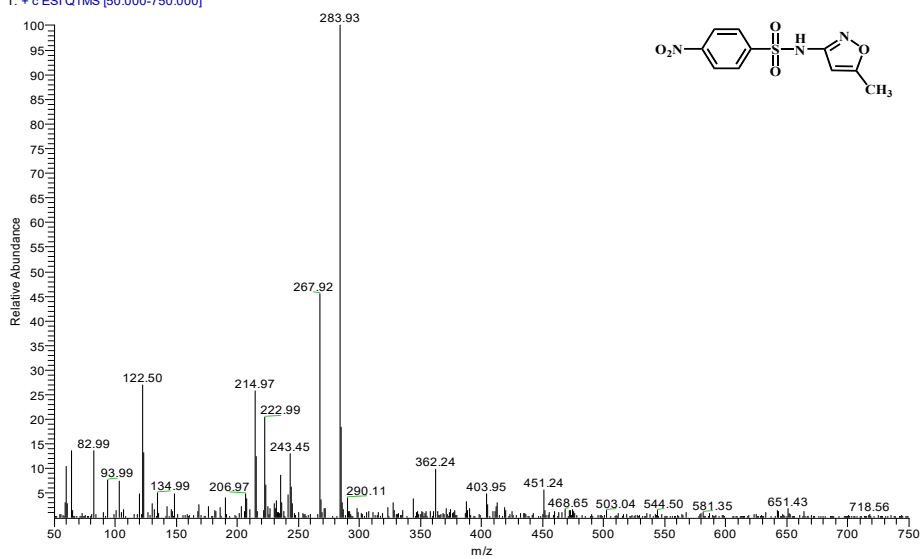

**Fig. S7.** Mass spectra of 284 in SMX degradation products.

20221213-zl-1p #928-942 RT: 11.56-11.73 AV: 15 SB: 27 7.68-8.01 NL: 7.84E6  
T: + c ESI Q1MS [50.000-750.000]

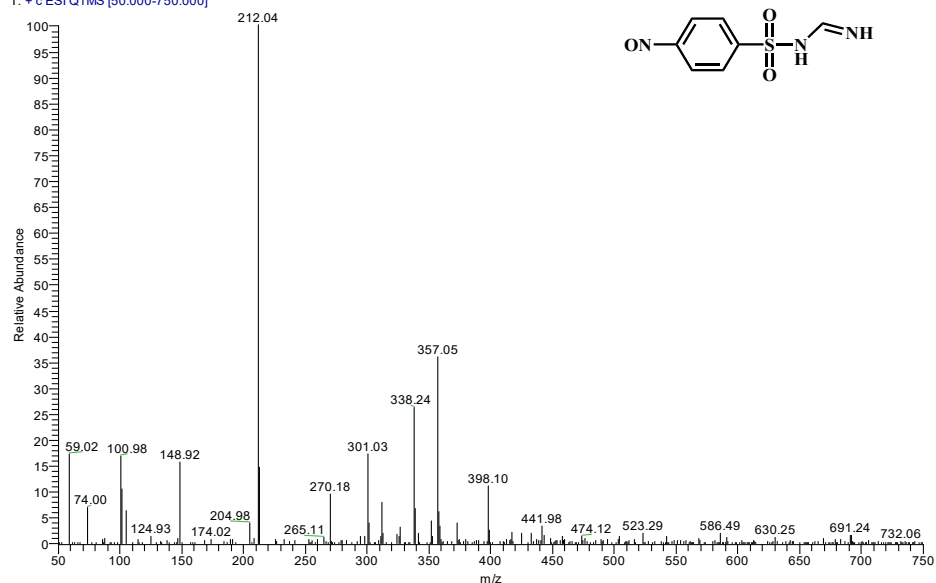

**Fig. S8.** Mass spectra of 212 in SMX degradation products.

20221213-zl-1p #568-579 RT: 7.07-7.21 AV: 12 SB: 246 2.90-5.95 NL: 1.95E7  
T: + c ESI Q1MS [50.000-750.000]

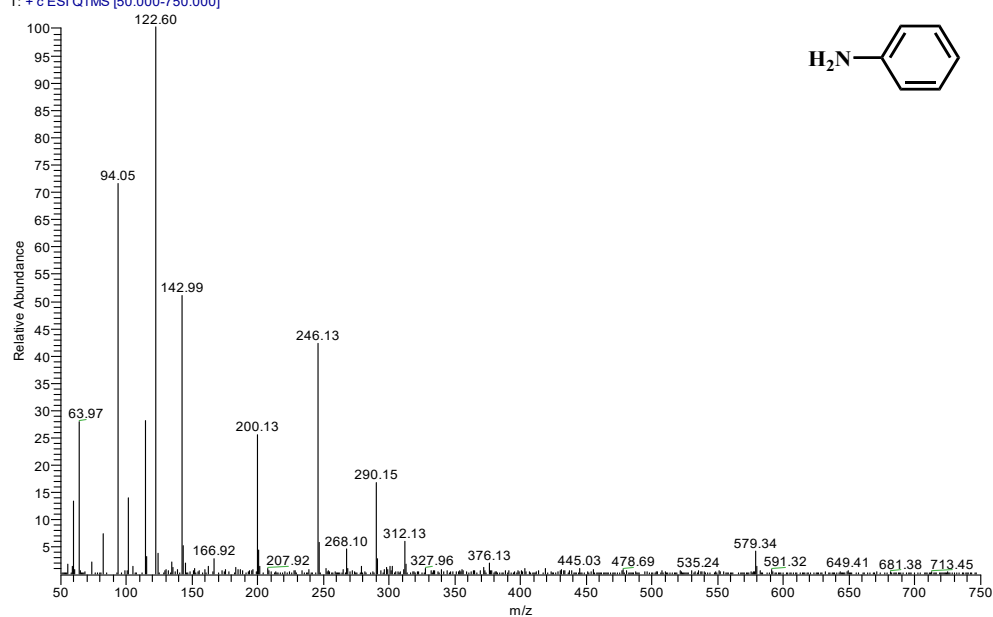

**Fig. S9.** Mass spectra of 94 in SMX degradation products.

20221213-zl-1p #212-226 RT: 2.64-2.81 AV: 15 SB: 155 0.32-2.24 NL: 1.09E7  
T: + c ESI Q1MS [50.000-750.000]

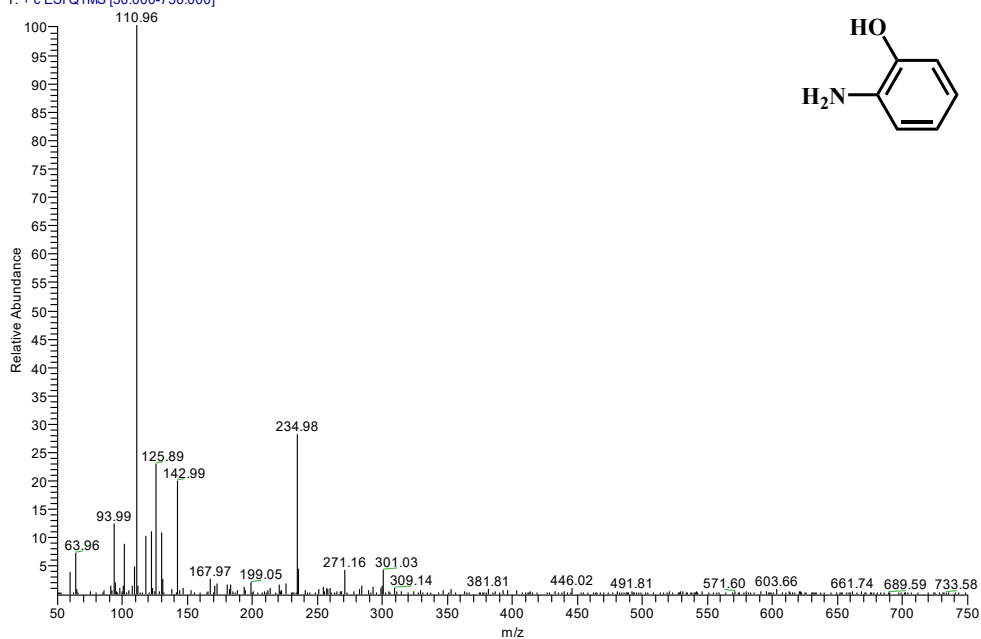

**Fig. S10.** Mass spectra of 110 in SMX degradation products.

20221213-zl-1p #167-174 RT: 2.08-2.16 AV: 8 SB: 11 0.03-0.16 NL: 3.96E7  
T: + c ESI Q1MS [50.000-750.000]

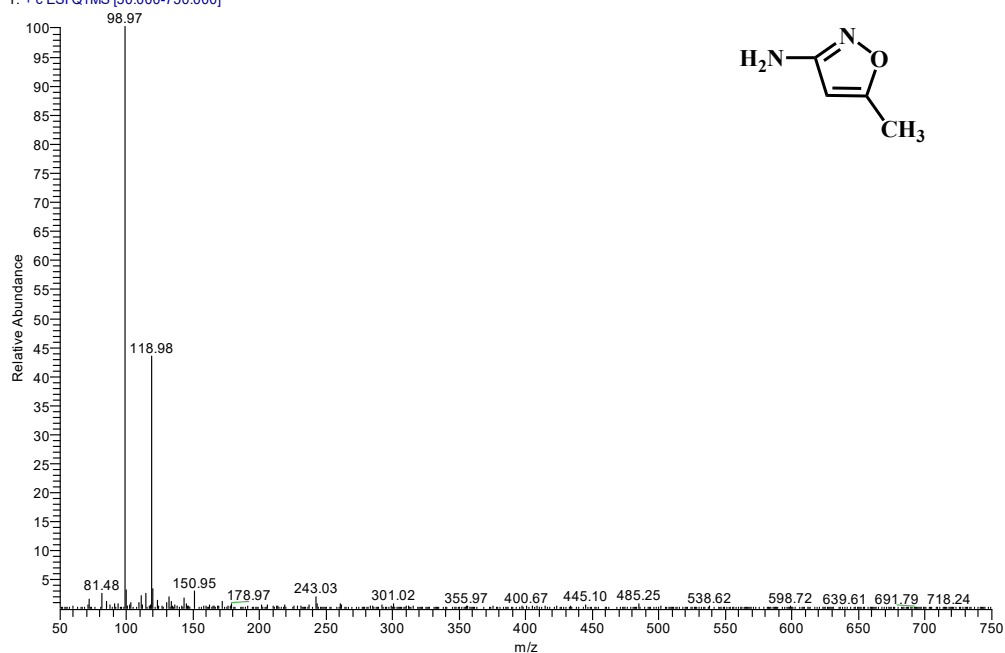

**Fig. S11.** Mass spectra of 99 in SMX degradation products.

20221213-z-1p #630-643 RT: 7.84-8.01 AV: 14 SB: 246 2.90-5.95 NL: 4.14E7  
T: + c ESI Q1MS [50.000-750.000]

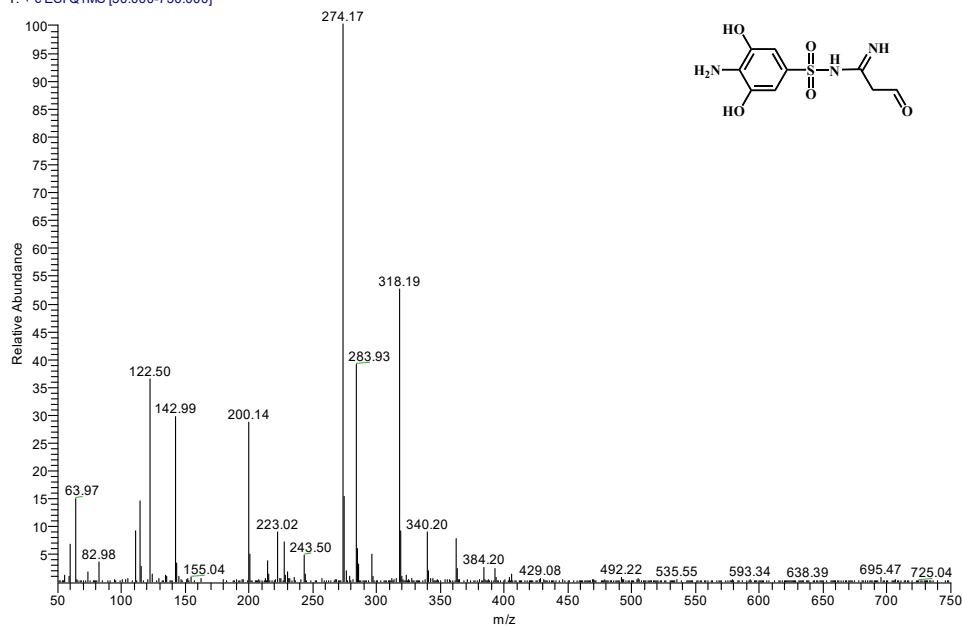

**Fig. S12.** Mass spectra of 274 in SMX degradation products.

20221213-z-1p #441-456 RT: 5.49-5.68 AV: 16 SB: 155 0.32-2.24 NL: 1.65E7  
T: + c ESI Q1MS [50.000-750.000]

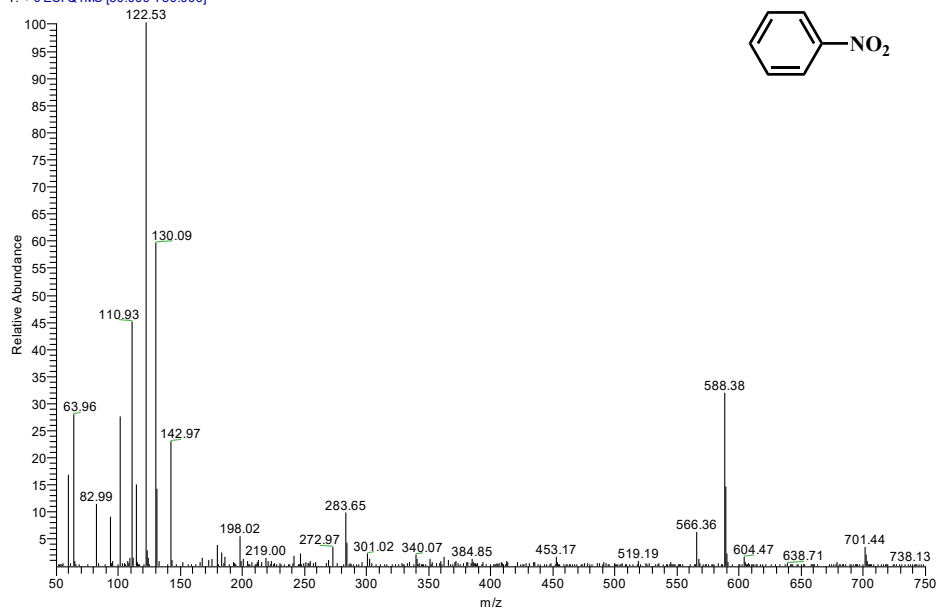

**Fig. S13.** Mass spectra of 123 in SMX degradation products.



20221213-z-1p #70-78 RT: 0.87-0.97 AV: 9 SB: 11 0.03-0.16 NL: 2.40E8  
T: + c ESI Q1MS [50.000-750.000]

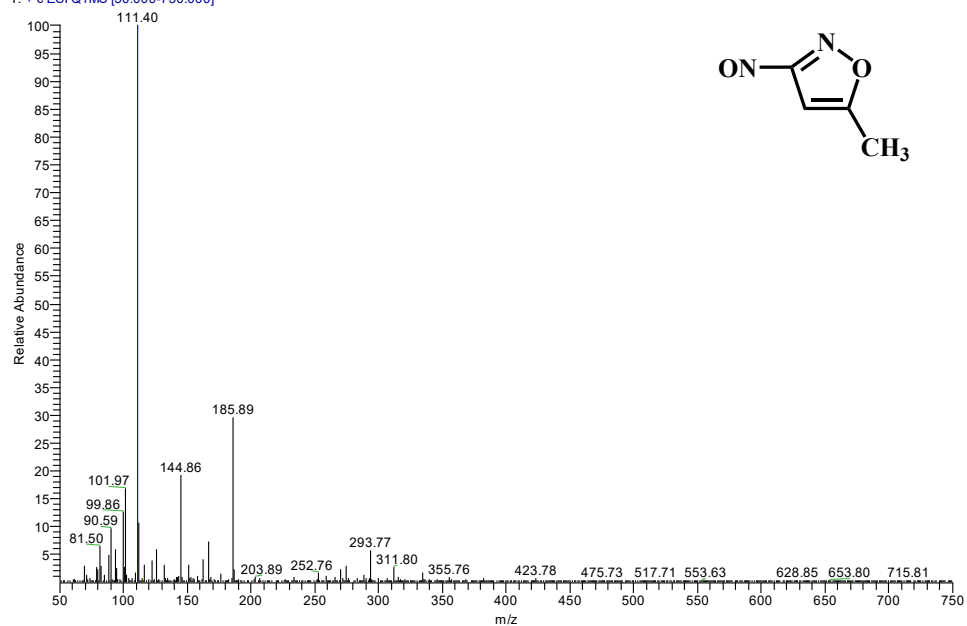

**Fig. S14.** Mass spectra of 111 in SMX degradation products.

20221213-z-1p #112-132 RT: 1.39-1.64 AV: 21 SB: 11 0.03-0.16 NL: 3.76E8  
T: + c ESI Q1MS [50.000-750.000]

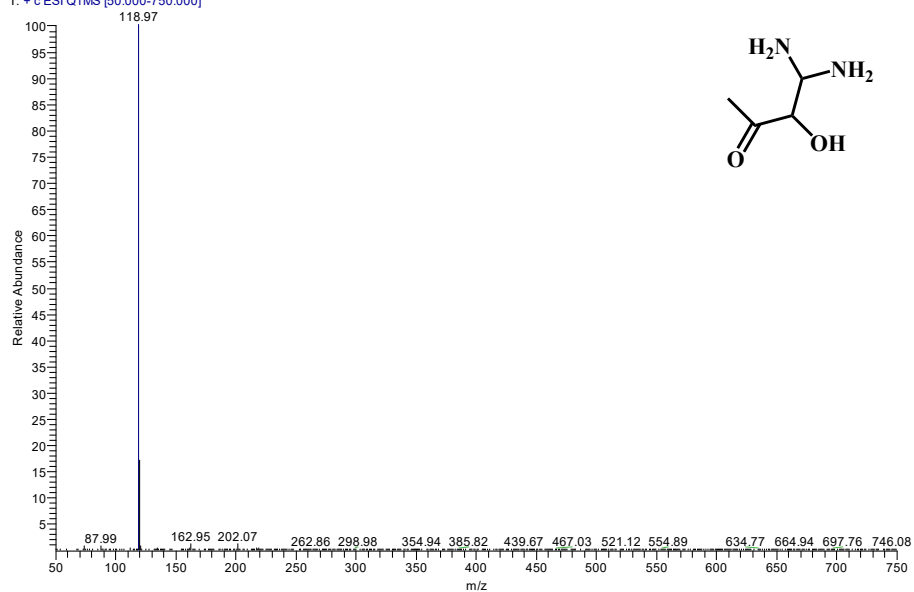

**Fig. S15.** Mass spectra of 119 in SMX degradation products.
